# Supplementary material for: Association between E-Cigarette Use Behaviors and Anxiety/Depression among Black/African American Adults Based on Sexual Identity
Source: MDPI journal article supplement (doi:10.3390/ijerph20032078), 2023-01-23
Supplement: s1 [file s1]

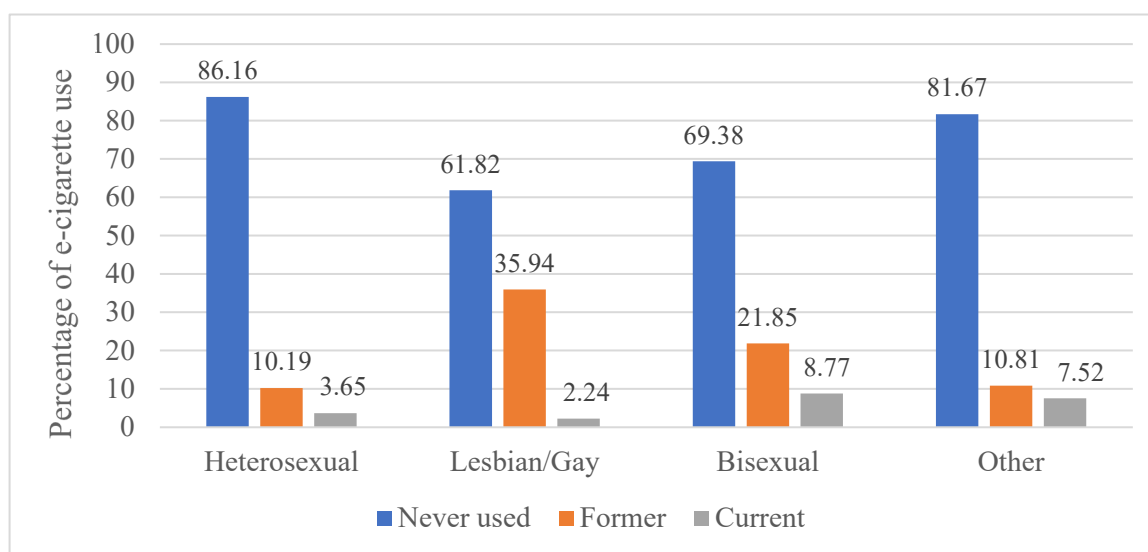

**Figure S1.** The prevalence of e-cigarette use behaviors (never, former, and current user) by sexual identity (heterosexual, lesbian/gay, bisexual, and other) among Black/African American adults.

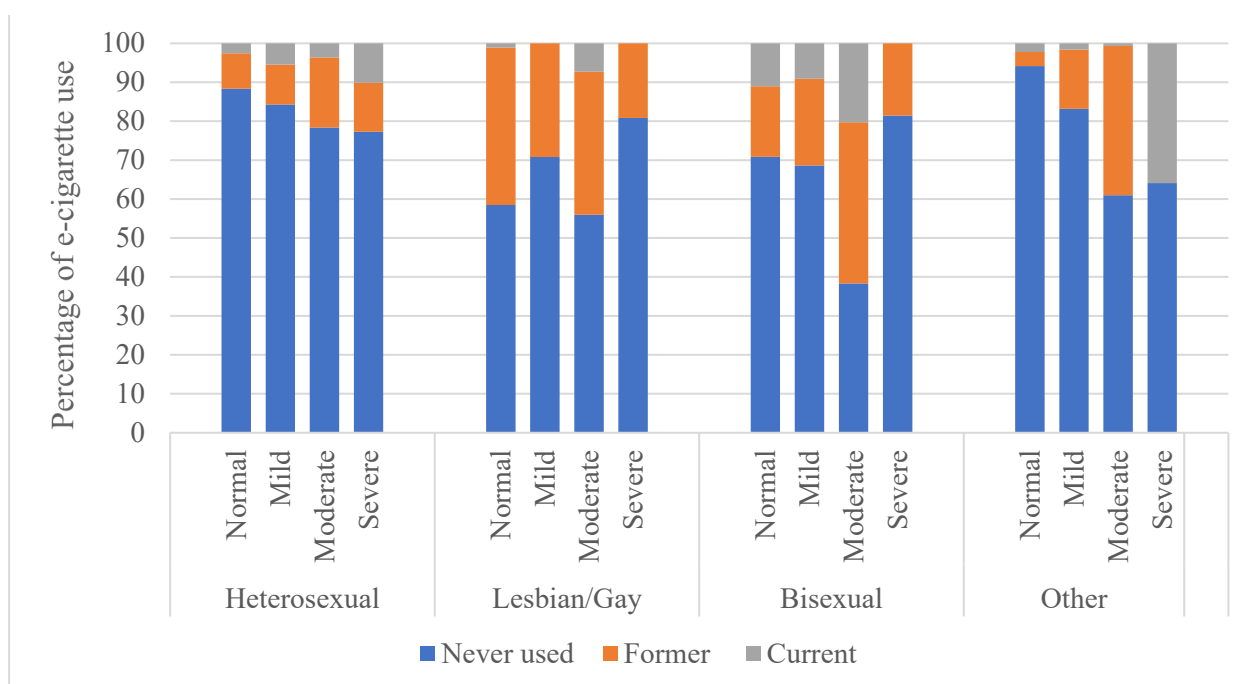

**Figure S2.** The prevalence of e-cigarette use behaviors by anxiety/depression based on sexual identity groups among Black/African American adults.

**Table S1.** The unadjusted association between e-cigarette use behaviors and sexual identity groups (heterosexual, lesbian, gay, bisexual, and other) among Black/African American adults.

|                        | Never Used E-Cigarette Versus: |               |             |              |
|------------------------|--------------------------------|---------------|-------------|--------------|
|                        | Former Use                     |               | Current Use |              |
|                        | RRR                            | 95% CI        | RRR         | 95% CI       |
| <b>Sexual identity</b> |                                |               |             |              |
| Heterosexual           | Ref                            |               |             |              |
| Lesbian/gay            | 4.92 ***                       | (2.13, 11.34) | 0.86        | (0.27, 2.72) |
| Bisexual               | 2.66 *                         | (1.12, 6.35)  | 2.99 *      | (1.30, 6.83) |
| Other                  | 1.12                           | (0.45, 2.77)  | 2.18        | (0.84, 5.64) |

RRR—relative risk ratio. Ref.—reference group. 95% CI—95% confidence interval. \*  $p < 0.05$ , \*\*\*  $p < 0.001$ .
